# Supplementary material
Source: Springer Nature journal article supplement (https://www.springermedizin.de/resource/supplementary/12885_2014_4959_MOESM11_ESM.pdf/9467818)

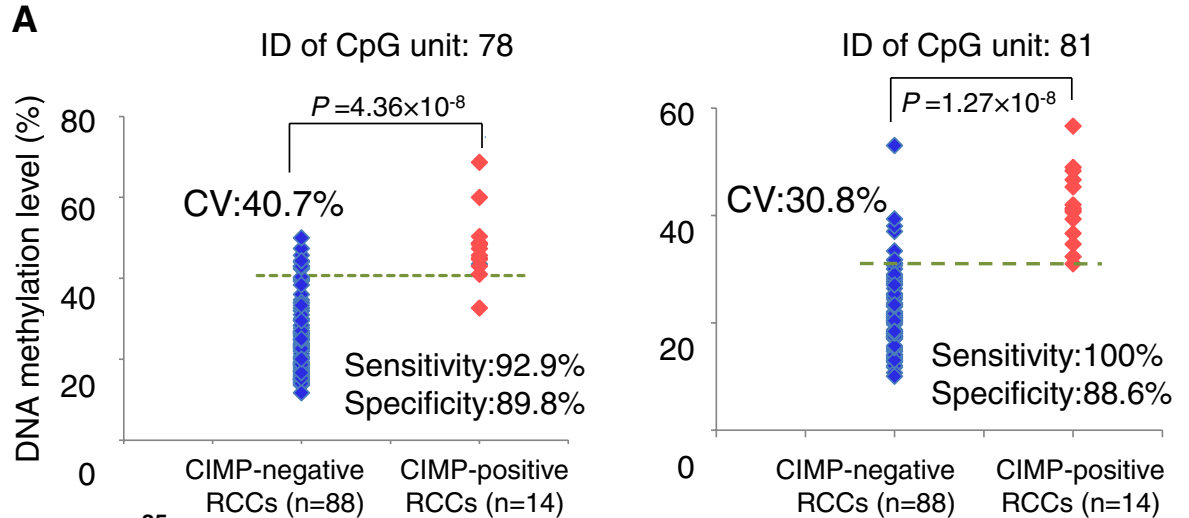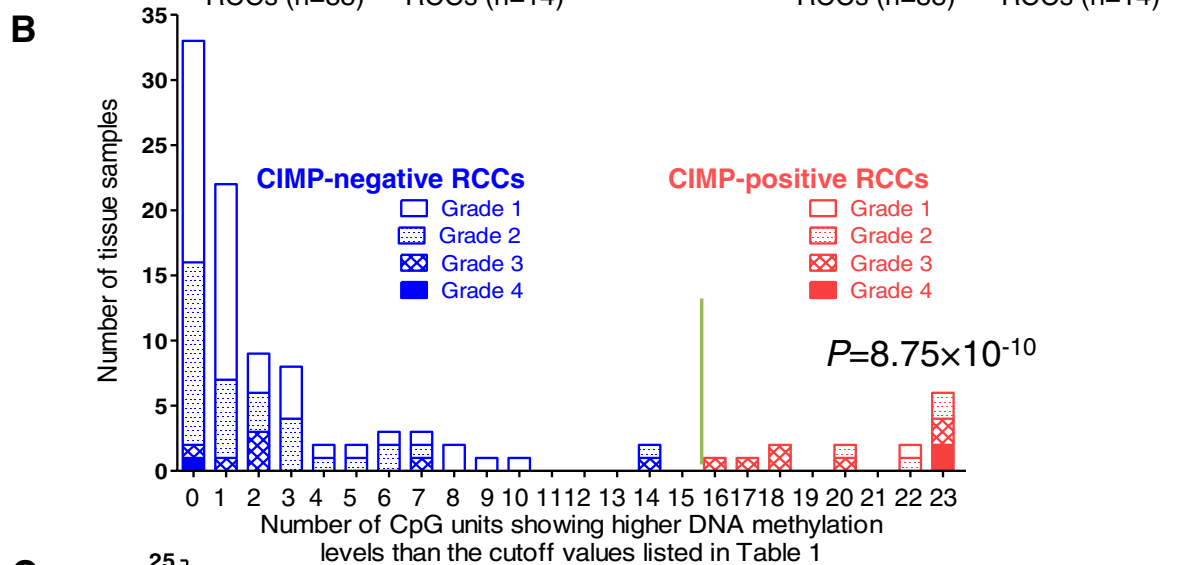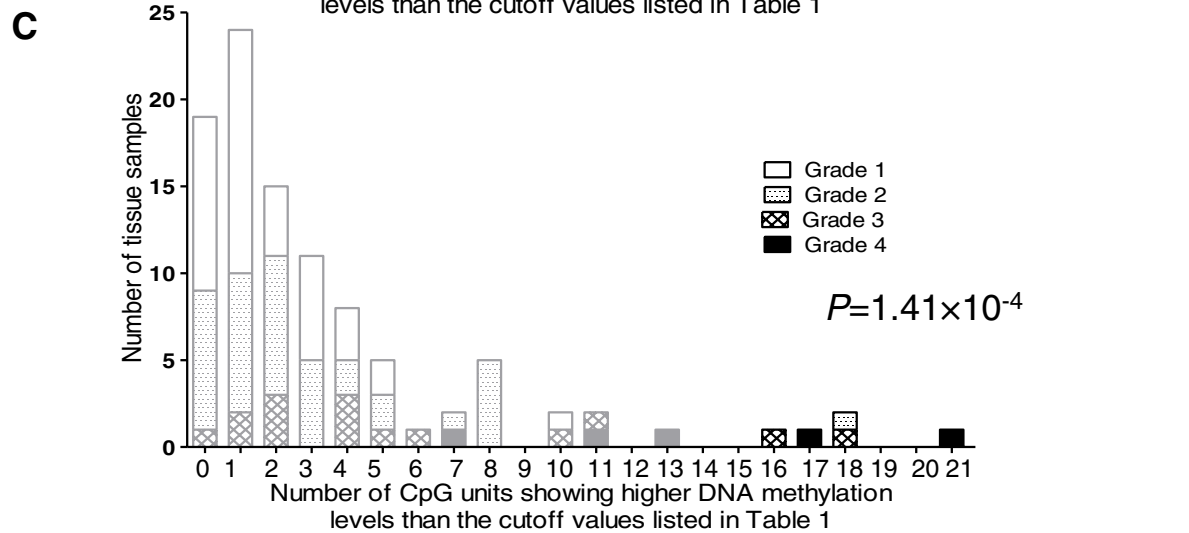

Supplement: MOESM11 [file 9467818]
